# Supplementary material for: Self-organized helical superstructure of photonic cellulose loaded with upconversion nanoparticles showing modulated luminescence
Source: Royal Society of Chemistry journal article supplement (doi:10.1039/c6ra13894b), 2016-01-01
Supplement: c6ra13894b1.pdf [file c6ra13894b1.pdf]

## Electronic Supplementary Information (ESI)

### Self-organized Helical Superstructure of Photonic Cellulose Loaded with Upconversion Nanoparticles Showing Modulated Luminescence

Haijing Jiang, Donglei Zhou, Dan Qu, Guang Chu, Wen Xu, Hongwei Song\* and Yan Xu\*

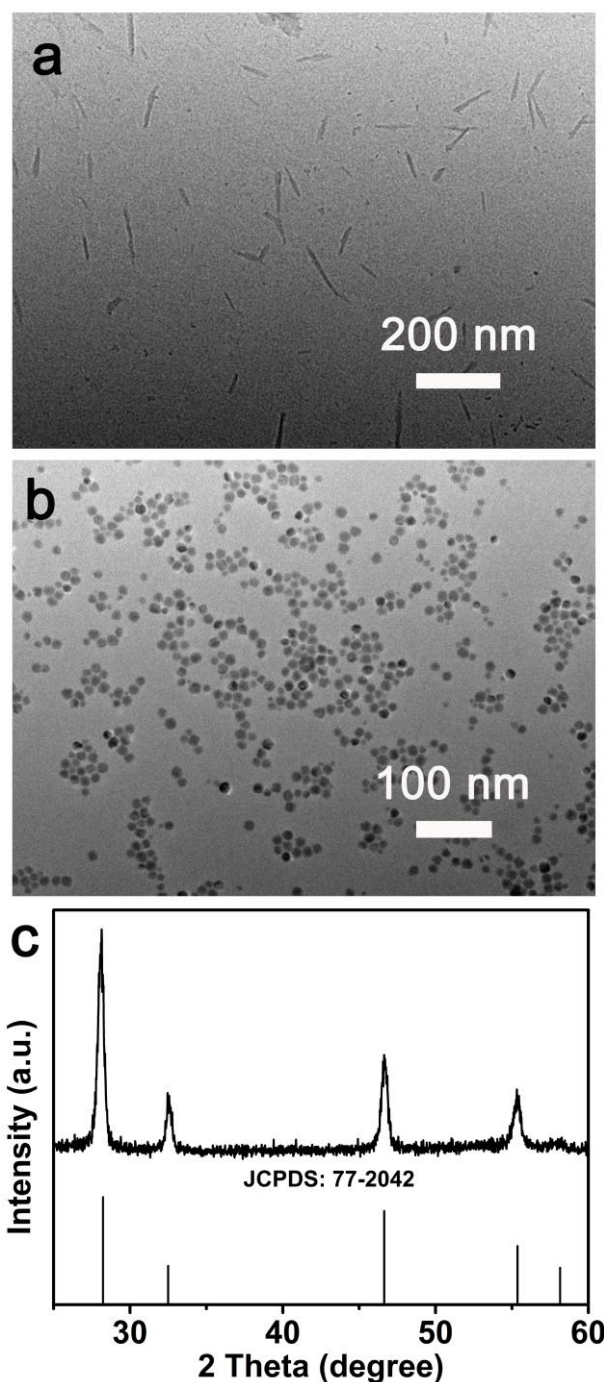

Figure S1 (a) TEM image of CNC suspension. (b) TEM image of NaYF<sub>4</sub>:Yb,Er suspension. (c) XRD pattern of NaYF<sub>4</sub>:Yb,Er showing the sole presence of cubic NaYF<sub>4</sub>.

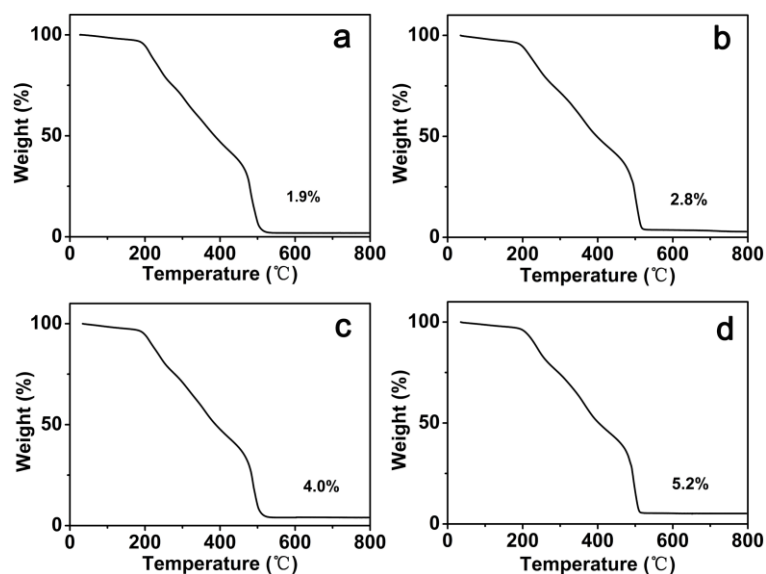

Figure S2 Thermogravimetric analysis of CNC-(NaYF<sub>4</sub>:Yb,Er)<sub>x</sub>: (a) x = 1.9%. (b) x = 2.8%. (c) x = 4.0%. (d) x = 5.2%.

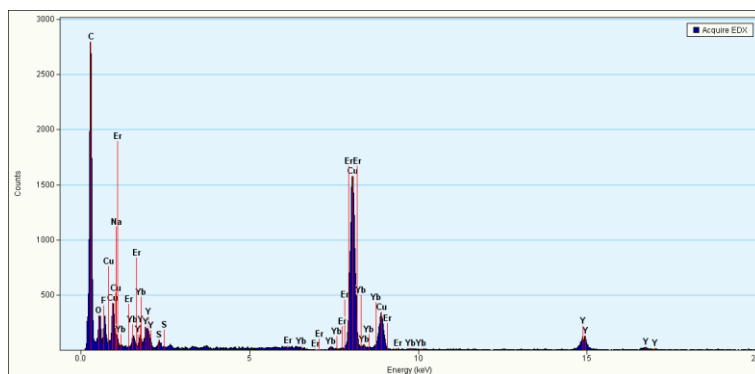

Figure S3 Energy-dispersive X-ray spectroscopy (EDX) elemental analysis of CNC-(NaYF<sub>4</sub>:Yb,Er)<sub>2.8%</sub>.

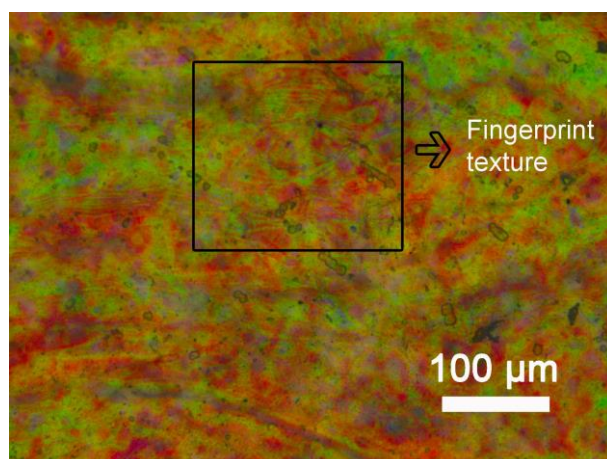

Figure S4 The POM of CNC-(NaYF<sub>4</sub>:Yb,Er)<sub>2.8%</sub> composite film showing the existence of fingerprint texture which demonstrate the formation of chiral nematic phase.

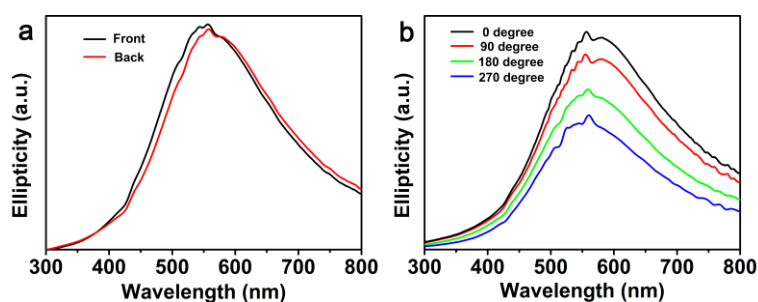

Figure S5 (a) The “front-and-back” CD measurements of the sample CNC-(NaYF<sub>4</sub>:Yb,Er)<sub>2.8%</sub> film. (b) the CD spectra rotated at different angles normal to the beam path.

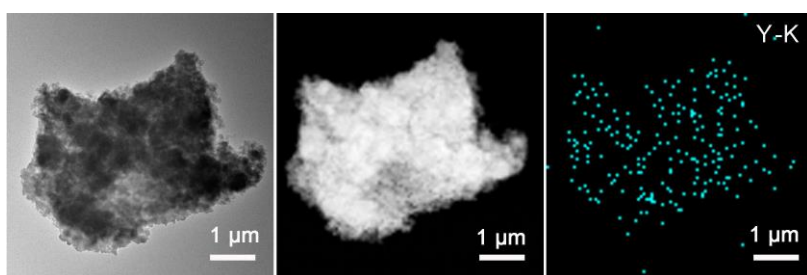

Figure S6 EDX elemental mapping of the CNC-(NaYF<sub>4</sub>:Yb,Er)<sub>2.8%</sub> film.

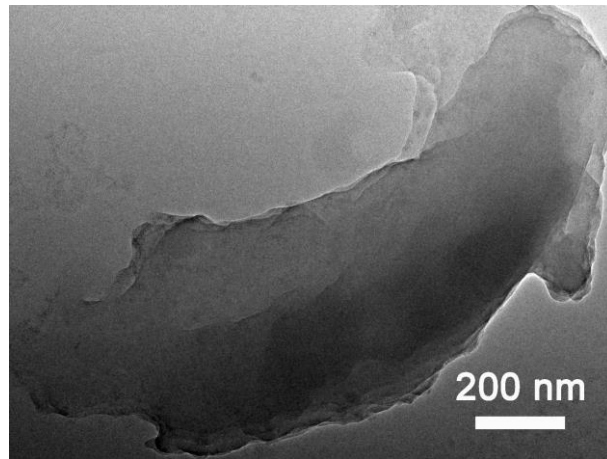

Figure S7 The TEM image of CNC film without NaYF<sub>4</sub>:Yb,Er nanoparticles.

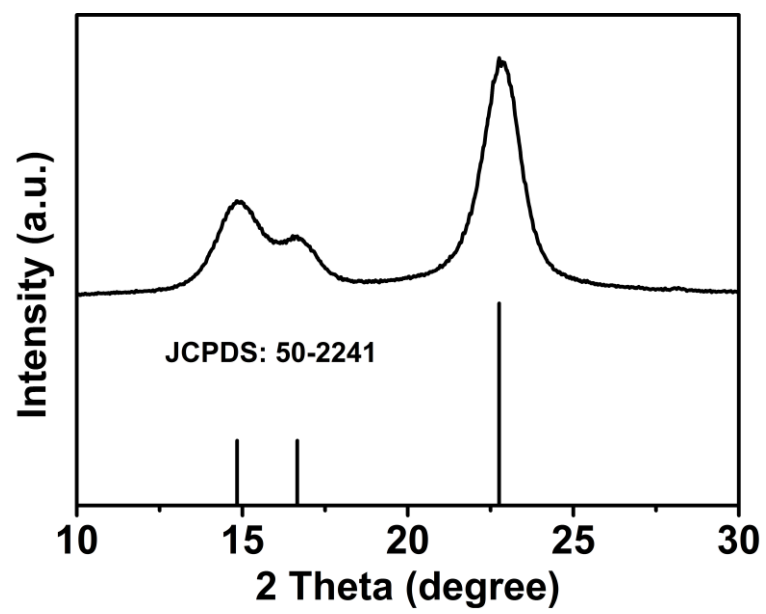

Figure S8 The XRD pattern of CNC film without NaYF<sub>4</sub>:Yb,Er upconversion nanoparticles.

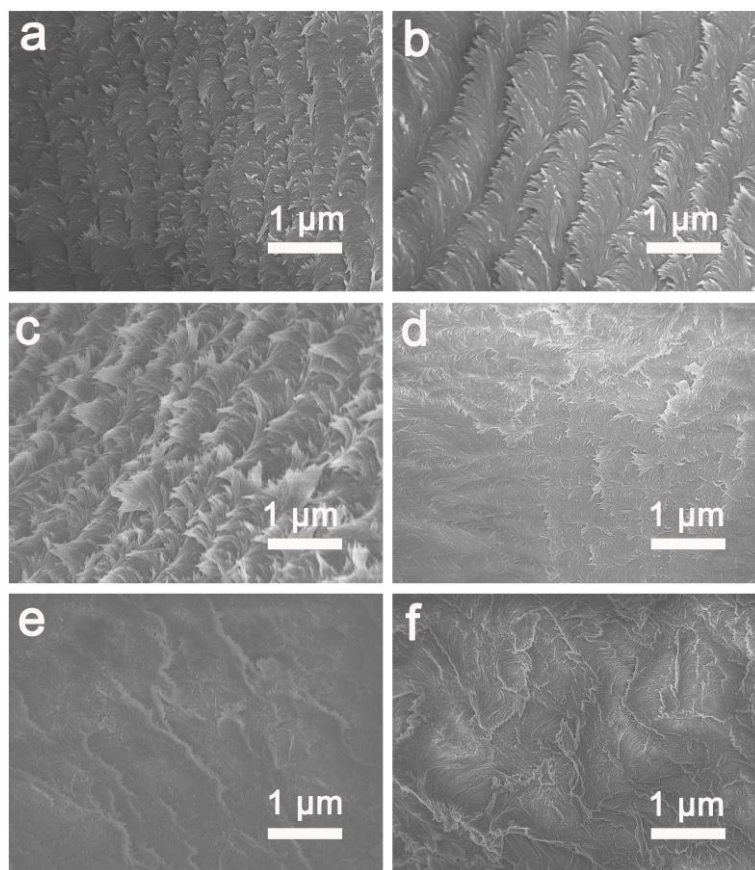

Figure S9 Composite films loaded with different amount of  $\text{NaYF}_4\text{:Yb,Er}$ : (a)  $\text{CNC-(NaYF}_4\text{:Yb,Er)}_{1.9\%}$ . (b)  $\text{CNC-(NaYF}_4\text{:Yb,Er)}_{2.8\%}$ . (c)  $\text{CNC-(NaYF}_4\text{:Yb,Er)}_{4.0\%}$ . (d)  $\text{CNC-(NaYF}_4\text{:Yb,Er)}_{5.2\%}$ . (e)  $\text{CNC-(NaYF}_4\text{:Yb,Er)}_{6.4\%}$ . (f)  $\text{CNC-(NaYF}_4\text{:Yb,Er)}_{7.5\%}$ .

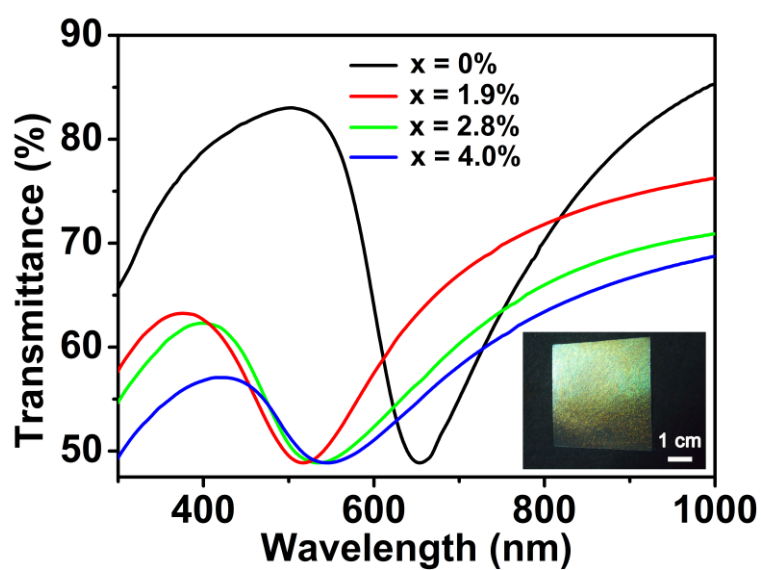

Figure S10 UV-vis spectra of  $\text{CNC-(NaYF}_4\text{:Yb,Er)}_{2.8\%}$  with the PBG of CNC at 650 nm. Inset is the photograph of the  $\text{CNC-(NaYF}_4\text{:Yb,Er)}_{2.8\%}$  film.

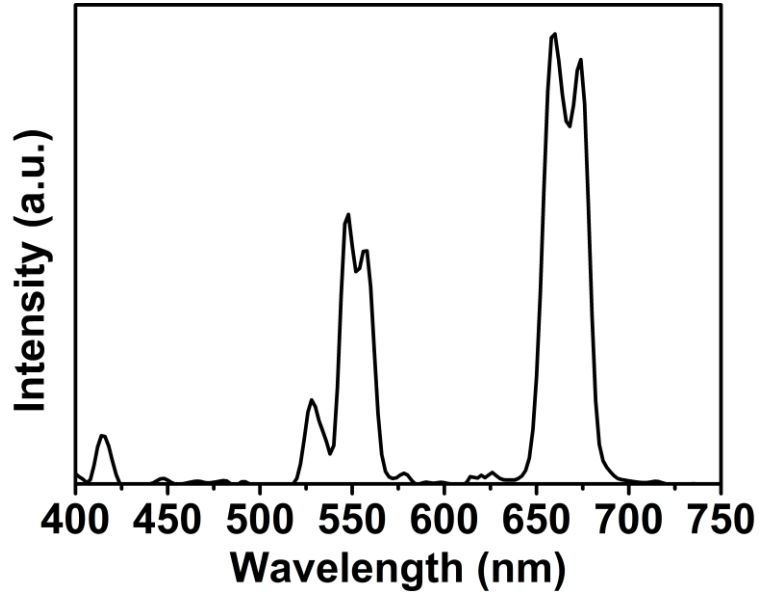

Figure S11 Room temperature emission spectrum of the NaYF<sub>4</sub>:Yb,Er suspension.

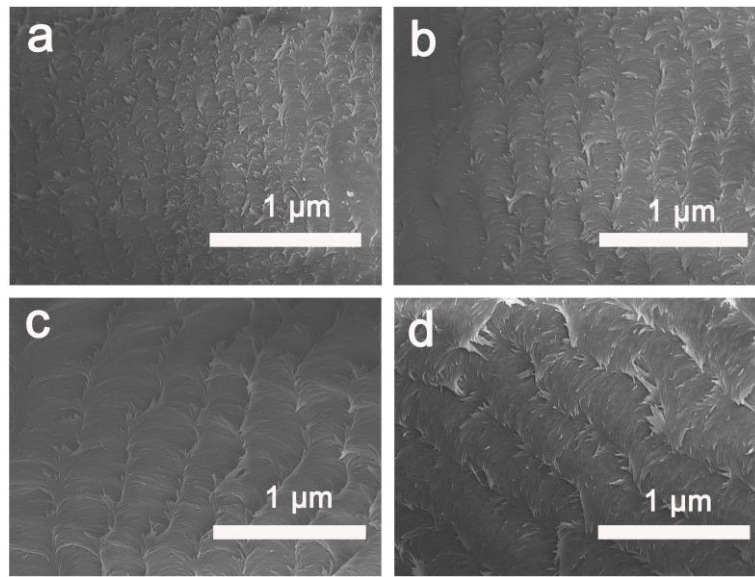

Figure S12 The SEM images showing the variation of pitch lengths by ultrasonic treatment.

Table S1 The variation of the helical pitch and the reflected wavelength of the chiral nematic film when treated by different ultrasonic time, which correspond to the SEM image a-d in Figure S12.

| Initial Pitch (nm) | Ultrasonic time (s) | Pitch (nm) | The reflected wavelength (nm) |
|--------------------|---------------------|------------|-------------------------------|
| 308                | 0                   | 308        | 474                           |
| 308                | 20                  | 455        | 700                           |
| 308                | 40                  | 611        | 940                           |
| 308                | 60                  | 758        | 1167                          |

The original CNC suspension was 40mL. The amplitude was set 20%. The ultrasonication was carried out with no pause.

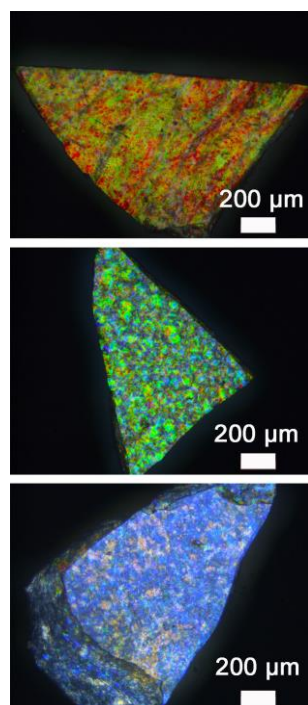

Figure S13 The low magnification POM of  $\text{CNC}_{650}\text{-(NaYF}_4\text{:Yb,Er)}_{2.8\%}$ ,  $\text{CNC}_{550}\text{-(NaYF}_4\text{:Yb,Er)}_{2.8\%}$  and  $\text{CNC}_{340}\text{-(NaYF}_4\text{:Yb,Er)}_{2.8\%}$  films.

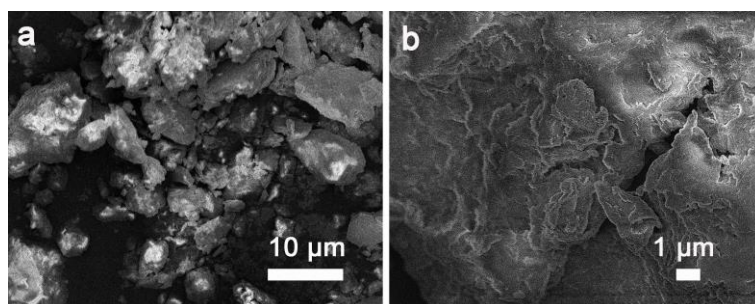

Figure S14 SEM Ref<sub>550</sub>, prepared by grinding  $\text{CNC}_{550}\text{-(NaYF}_4\text{:Yb,Er)}_{2.8\%}$ , showing loss of the chiral nematic ordering. (a) Low magnification SEM. (b) High magnification.
